# Supplementary material for: Epigenomic charting and functional annotation of risk loci in renal cell carcinoma
Source: PubMed Central journal article supplement (PMC9867739; doi:10.1038/s41467-023-35833-5), 2023-01-21
Supplement: 41467_2023_35833_MOESM31_ESM.pdf [file 41467_2023_35833_MOESM31_ESM.pdf]

Corresponding author(s): Matthew FreedmanLast updated by author(s): 12/4/2022

## Reporting Summary

Nature Portfolio wishes to improve the reproducibility of the work that we publish. This form provides structure for consistency and transparency in reporting. For further information on Nature Portfolio policies, see our [Editorial Policies](#) and the [Editorial Policy Checklist](#).

### Statistics

For all statistical analyses, confirm that the following items are present in the figure legend, table legend, main text, or Methods section.

n/a Confirmed

- The exact sample size ( $n$ ) for each experimental group/condition, given as a discrete number and unit of measurement
- A statement on whether measurements were taken from distinct samples or whether the same sample was measured repeatedly
- The statistical test(s) used AND whether they are one- or two-sided  
*Only common tests should be described solely by name; describe more complex techniques in the Methods section.*
- A description of all covariates tested
- A description of any assumptions or corrections, such as tests of normality and adjustment for multiple comparisons
- A full description of the statistical parameters including central tendency (e.g. means) or other basic estimates (e.g. regression coefficient) AND variation (e.g. standard deviation) or associated estimates of uncertainty (e.g. confidence intervals)
- For null hypothesis testing, the test statistic (e.g.  $F$ ,  $t$ ,  $r$ ) with confidence intervals, effect sizes, degrees of freedom and  $P$  value noted  
*Give  $P$  values as exact values whenever suitable.*
- For Bayesian analysis, information on the choice of priors and Markov chain Monte Carlo settings
- For hierarchical and complex designs, identification of the appropriate level for tests and full reporting of outcomes
- Estimates of effect sizes (e.g. Cohen's  $d$ , Pearson's  $r$ ), indicating how they were calculated

*Our web collection on [statistics for biologists](#) contains articles on many of the points above.*

### Software and code

Policy information about [availability of computer code](#)

Data collection

Data collection and analyses were performed R version 4.0.1. Raw Illumina output was converted to fastq format using Illumina bcl2fastq v2.18

Data analysis

Data collection and analyses were performed R version 4.0.1. All software or code used in the study, along with version numbers, is described in the methods section. We used: 1) HOMER version 4.7; 2) the Burrows-Wheeler Aligner (BWA) version 0.7.15; 3) DESeq 1.14.1; 4) GREAT v3.0; 5) MACS v2.1.1.20140616; 6) prcomp R function; 7) BEDTools v2.26.0.; 8) R package jsd version 0.1; 8) ROSE2; 9) Genome Analysis Toolkit v3.8

For manuscripts utilizing custom algorithms or software that are central to the research but not yet described in published literature, software must be made available to editors and reviewers. We strongly encourage code deposition in a community repository (e.g. GitHub). See the Nature Portfolio [guidelines for submitting code & software](#) for further information.

### Data

Policy information about [availability of data](#)

All manuscripts must include a [data availability statement](#). This statement should provide the following information, where applicable:

- Accession codes, unique identifiers, or web links for publicly available datasets
- A description of any restrictions on data availability
- For clinical datasets or third party data, please ensure that the statement adheres to our [policy](#)

Sequencing reads are aligned to the human genome build hg19. The DFCE datasets generated in this study have been deposited in the Gene Expression Omnibus

(GEO) database under accession code (GSE188486; <https://www.ncbi.nlm.nih.gov/geo/query/acc.cgi?acc=GSE188486>). The TCGA Kidney Renal Clear Cell Carcinoma (KIRC) publicly available data used in this study are available in a public repository from the Broad Institute Firehose Pipeline (<http://gdac.broadinstitute.org>). All clinical and correlative sequencing data from the publicly available CheckMate 009/010/025 clinical trials are made separately available as part of the accompanying paper (European Genome-Phenome Archive (<https://ega-archive.org/>; accession numbers EGAS00001004291 and EGAS00001004292)121. The remaining data are available within the Article, Supplementary Information or Source Data file. Any other queries about the data used in this study should be directed to the corresponding authors of this study.

## Human research participants

Policy information about [studies involving human research participants and Sex and Gender in Research.](#)

|                             |                                                                                                                                                                                                                                                                                                                                                                                                                                                                      |
|-----------------------------|----------------------------------------------------------------------------------------------------------------------------------------------------------------------------------------------------------------------------------------------------------------------------------------------------------------------------------------------------------------------------------------------------------------------------------------------------------------------|
| Reporting on sex and gender | We included sex and age                                                                                                                                                                                                                                                                                                                                                                                                                                              |
| Population characteristics  | See above                                                                                                                                                                                                                                                                                                                                                                                                                                                            |
| Recruitment                 | Participants with the tumor histologies of interest were included as long as they had available frozen tissue.                                                                                                                                                                                                                                                                                                                                                       |
| Ethics oversight            | All tumor samples at DFCI were obtained at the time of resection at Brigham and Women/s Hospital, and were collected under a DFCI/Harvard Cancer Center IRB-approved protocol (01-045) with informed consent of patients. No monetary compensation was offered for patient participation. The samples were then stored fresh frozen in the Gelb Center biobank at the Dana-Farber Cancer Institute, under a protocol approved by the MGB Institutional Review Board. |

Note that full information on the approval of the study protocol must also be provided in the manuscript.

## Field-specific reporting

Please select the one below that is the best fit for your research. If you are not sure, read the appropriate sections before making your selection.

Life sciences  Behavioural & social sciences  Ecological, evolutionary & environmental sciences

For a reference copy of the document with all sections, see [nature.com/documents/nr-reporting-summary-flat.pdf](https://www.nature.com/documents/nr-reporting-summary-flat.pdf)

## Life sciences study design

All studies must disclose on these points even when the disclosure is negative.

|                 |                                                                                                                                                                                                                                                                                                                                        |
|-----------------|----------------------------------------------------------------------------------------------------------------------------------------------------------------------------------------------------------------------------------------------------------------------------------------------------------------------------------------|
| Sample size     | No statistical method is needed to determine sample size for H3K27Ac, H3Kme2, and EPAS1 TF ChIP-seq. All participants with the tumor histologies of interest were included as long as they had available frozen tissue. For epigenetic analyses, 5 or more specimens is sufficient for identifying cistromic changes in human cancers. |
| Data exclusions | No data exclusion                                                                                                                                                                                                                                                                                                                      |
| Replication     | Confirmed - FOXA1 Overexpression and EPAS1 knock-down experiments were performed twice independently with reproducible results obtained.                                                                                                                                                                                               |
| Randomization   | This is not relevant to this study as comparisons were performed across distinct clinical states. Samples were allocated into experimental groups based on prior knowledge of the clinical features (histologic subtype of renal cell carcinoma)                                                                                       |
| Blinding        | Immunohistochemistry for BHLHE41, HNF1B, NKX6.1, and ZNF395 was performed in a blinded fashion. All unsupervised analyses described in the study, such as cistrome-wide analyses across states, were blinded as to clinical state of each specimens                                                                                    |

## Reporting for specific materials, systems and methods

We require information from authors about some types of materials, experimental systems and methods used in many studies. Here, indicate whether each material, system or method listed is relevant to your study. If you are not sure if a list item applies to your research, read the appropriate section before selecting a response.

## Materials &amp; experimental systems

## Methods

|                                     |                                                           |
|-------------------------------------|-----------------------------------------------------------|
| n/a                                 | Involved in the study                                     |
| <input type="checkbox"/>            | <input checked="" type="checkbox"/> Antibodies            |
| <input type="checkbox"/>            | <input checked="" type="checkbox"/> Eukaryotic cell lines |
| <input checked="" type="checkbox"/> | <input type="checkbox"/> Palaeontology and archaeology    |
| <input checked="" type="checkbox"/> | <input type="checkbox"/> Animals and other organisms      |
| <input type="checkbox"/>            | <input checked="" type="checkbox"/> Clinical data         |
| <input checked="" type="checkbox"/> | <input type="checkbox"/> Dual use research of concern     |

|                                     |                                                 |
|-------------------------------------|-------------------------------------------------|
| n/a                                 | Involved in the study                           |
| <input type="checkbox"/>            | <input checked="" type="checkbox"/> ChIP-seq    |
| <input checked="" type="checkbox"/> | <input type="checkbox"/> Flow cytometry         |
| <input checked="" type="checkbox"/> | <input type="checkbox"/> MRI-based neuroimaging |

## Antibodies

## Antibodies used

antibodies against mouse HNF1 $\beta$  (Santa Cruz, sc-130407, 1:50 dilution), mouse BHLHE41 (Thermofisher, TA806146, 1:200 dilution), rabbit NKX6.1 (Cell signaling, #54551, 1:50 dilution), rabbit ZNF395 (Lsbio, LS-B5647-100, 1:500 dilution), H3K27ac (Diagenode, C15410196, 1 $\mu$ g/IP dilution), H3K4me2 (Diagenode, C15410035, 1 $\mu$ g/IP dilution), EPAS1 (1:100 dilution, Abcam, ab199)

Sections were then stained with appropriate secondary antibodies per manufacturer recommendations (ImmPRESS HRP anti-rabbit and anti-mouse IgG Polymer detection kits: MP-7451; MP-7402, Vector laboratories).

## Validation

- 1) HNF1 $\beta$  (Santa Cruz, sc-130407, 1:50 dilution): HNF-1b (94.8) is a mouse monoclonal antibody raised against recombinant HNF-1b of human origin - PMID: 24115587; product datasheet <https://datasheets.scbt.com/sc-130407.pdf>
- 2) BHLHE41 (Thermofisher, TA806146, 1:200 dilution): SHARP1 (BHLHE41) Mouse Monoclonal Antibody - product datasheet <https://cdn.origene.com/datasheet/ta806146.pdf>
- 3) NKX6.1 (Cell signaling, #54551, 1:50 dilution): Rabbit mAb recognizes endogenous levels of total NKX6.1 protein - PMID: 35393479; product datasheet <https://www.cellsignal.com/products/primary-antibodies/nkx6-1-d8o4r-rabbit-mab/54551>
- 4) ZNF395 (Lsbio, LS-B5647-100, 1:500 dilution): Unconjugated rabbit polyclonal antibody to ZNF395 (C-Terminus) from human - product datasheet <https://www.lsbio.com/antibodies/ihc-plus-znf395-antibody-c-terminus-ihc-wb-western-ls-b5647/140253>
- 5) H3K27Ac (Diagenode, C15410196, 1 $\mu$ g/IP dilution): Polyclonal, ChIP grade, ChIP-seq grade (source: Rabbit) - PMID 30773341; product datasheet - [https://www.diagenode.com/files/products/antibodies/Datasheet\\_H3K27ac\\_C15410196.pdf](https://www.diagenode.com/files/products/antibodies/Datasheet_H3K27ac_C15410196.pdf)
- 6) H3K4me2 (Diagenode, C15410035, 1 $\mu$ g/IP dilution): Polyclonal ChIP grade/ChIP-seq grade (source: Rabbit) - PMID: 30244833; product datasheet - [https://www.diagenode.com/files/products/antibodies/Datasheet\\_H3K4me2\\_pAb-035-050.pdf](https://www.diagenode.com/files/products/antibodies/Datasheet_H3K4me2_pAb-035-050.pdf)
- 7) EPAS1 (Abcam, ab199, 1:100 dilution): Rabbit polyclonal to HIF-2-alpha - PMID: 35177645; product datasheet <https://www.abcam.com/hif-2-alpha-antibody-ab199.html>

## Eukaryotic cell lines

Policy information about [cell lines and Sex and Gender in Research](#)

## Cell line source(s)

786-O cell line was obtained from ATCC

## Authentication

786-O cell line was originally purchased from a certified commercial vendor (ATCC). No further authentication was performed.

## Mycoplasma contamination

Cell lines tested negative for mycoplasma contamination

Commonly misidentified lines  
(See [ICLAC](#) register)

No commonly misidentified cell lines were used in the study

## Clinical data

Policy information about [clinical studies](#)

All manuscripts should comply with the ICMJE [guidelines for publication of clinical research](#) and a completed [CONSORT checklist](#) must be included with all submissions.

## Clinical trial registration

Not applicable

## Study protocol

Not applicable as this is not a clinical trial

## Data collection

Retrospective clinical data was collected and included demographics of the patients such as sex, RCC subtype, grade of tumor and stage of tumor. For the Checkmate 009/010/025, data is publicly available as part of an accompanying paper (Braun et al., Nature Medicine, 2020)

## Outcomes

Not applicable

## Data deposition

- Confirm that both raw and final processed data have been deposited in a public database such as [GEO](#).
- Confirm that you have deposited or provided access to graph files (e.g. BED files) for the called peaks.

## Data access links

*May remain private before publication.*

The DFICI datasets generated during and/or analyzed during the current study are available in the GEO repository (GSE188486)

## Files in database submission

GSM5683693 K271014T  
 GSM5683694 K271058T  
 GSM5683695 K271091T  
 GSM5683696 K271120T  
 GSM5683697 K271226T  
 GSM5683698 K271247A  
 GSM5683699 K27233T  
 GSM5683700 K27716T  
 GSM5683701 K27951T  
 GSM5683702 K27962T  
 GSM5683703 K27968M  
 GSM5683704 RT0301\_H3K27ac  
 GSM5683705 RT0356\_H3K27ac  
 GSM5683706 RT0638\_H3K27ac  
 GSM5683707 RT0642\_H3K27ac  
 GSM5683708 RT1002\_H3K27ac  
 GSM5683709 RT1039\_H3K27ac  
 GSM5683710 RT1043\_H3K27ac  
 GSM5683711 RT1046\_H3K27ac  
 GSM5683712 RT1047\_H3K27ac  
 GSM5683713 RT1056\_H3K27ac  
 GSM5683714 RT1059\_H3K27ac  
 GSM5683715 RT1097\_H3K27ac  
 GSM5683716 RT1131\_H3K27ac  
 GSM5683717 RT1143\_H3K27ac  
 GSM5683718 RT1149\_H3K27ac  
 GSM5683719 RT1152\_H3K27ac  
 GSM5683720 RT1168\_H3K27ac  
 GSM5683721 RT1184\_H3K27ac  
 GSM5683722 RT1205\_H3K27ac  
 GSM5683723 RT1240\_H3K27ac  
 GSM5683724 RT1265\_H3K27ac  
 GSM5683725 RT929\_H3K27ac  
 GSM5683726 RT957\_H3K27ac  
 GSM5683727 RT970\_H3K27ac  
 GSM5683728 RT991\_H3K27ac  
 GSM5683729 RT998\_H3K27ac  
 GSM5683730 S20449\_H3K27ac  
 GSM5683731 S21381\_H3K27ac  
 GSM5683732 S21429\_H3K27ac  
 GSM5683733 S22741\_H3K27ac  
 GSM5683734 RT0301\_H3K4me2  
 GSM5683735 RT0356\_H3K4me2  
 GSM5683736 RT0638\_H3K4me2  
 GSM5683737 RT0642\_H3K4me2  
 GSM5683738 RT1002\_H3K4me2  
 GSM5683739 RT1039\_H3K4me2  
 GSM5683740 RT1043\_H3K4me2  
 GSM5683741 RT1046\_H3K4me2  
 GSM5683742 RT1047\_H3K4me2  
 GSM5683743 RT1056\_H3K4me2  
 GSM5683744 RT1059\_H3K4me2  
 GSM5683745 RT1149\_H3K4me2  
 GSM5683746 RT1152\_H3K4me2  
 GSM5683747 RT1168\_H3K4me2  
 GSM5683748 RT1240\_H3K4me2  
 GSM5683749 RT1265\_H3K4me2

GSM5683750 RT929\_H3K4me2  
 GSM5683751 RT957\_H3K4me2  
 GSM5683752 RT970\_H3K4me2  
 GSM5683753 RT991\_H3K4me2  
 GSM5683754 RT998\_H3K4me2  
 GSM5683755 S20449\_H3K4me2  
 GSM5683756 S21381\_H3K4me2  
 GSM5683757 S22741\_H3K4me2  
 GSM5683758 1039T2AT  
 GSM5683759 1056T1AT  
 GSM5683760 1059T1AT  
 GSM5683761 IN1014T  
 GSM5683762 IN1058T  
 GSM5683763 IN1091T  
 GSM5683764 IN1120T  
 GSM5683765 IN1226T  
 GSM5683766 IN1247A  
 GSM5683767 IN233T  
 GSM5683768 IN716T  
 GSM5683769 IN951T  
 GSM5683770 IN962T  
 GSM5683771 IN968M  
 GSM5683772 RT0301\_IN  
 GSM5683773 RT0356\_IN  
 GSM5683774 RT0638\_IN  
 GSM5683775 RT0642\_IN  
 GSM5683776 RT1002\_IN  
 GSM5683777 RT1039\_IN  
 GSM5683778 RT1043\_IN  
 GSM5683779 RT1046\_IN  
 GSM5683780 RT1047\_IN  
 GSM5683781 RT1056\_IN  
 GSM5683782 RT1059\_IN  
 GSM5683783 RT1097\_IN  
 GSM5683784 RT1131\_IN  
 GSM5683785 RT1143\_IN  
 GSM5683786 RT1149\_IN  
 GSM5683787 RT1152\_IN  
 GSM5683788 RT1168\_IN  
 GSM5683789 RT1184\_IN  
 GSM5683790 RT1205\_IN  
 GSM5683791 RT1240\_IN  
 GSM5683792 RT1265\_IN  
 GSM5683793 RT929\_IN  
 GSM5683794 RT957\_IN  
 GSM5683795 RT970\_IN  
 GSM5683796 RT991\_IN  
 GSM5683797 RT998\_IN  
 GSM5683798 S20449\_IN  
 GSM5683799 S21381\_IN  
 GSM5683800 S21429\_IN  
 GSM5683801 S22741\_IN  
 GSM5683802 R0929TAT  
 GSM5683803 R0957TAT  
 GSM5683804 R0998TAT  
 GSM5683805 R1097TAT  
 GSM5683806 R1149TAT  
 GSM5683807 R1152TAT  
 GSM5683808 R991T1AT

Genome browser session  
 (e.g. [UCSC](#))

Not applicable

## Methodology

Replicates

Experiments on the 786-O cell line with knock-down and OE were performed in duplicates

Sequencing depth

150bp paired-end sequencing was performed on the Illumina platform. Data shown in Table S26

|                         |                                                                                                                                                                                                                                                                                                                                  |
|-------------------------|----------------------------------------------------------------------------------------------------------------------------------------------------------------------------------------------------------------------------------------------------------------------------------------------------------------------------------|
| Antibodies              | H3K27ac, Diagenode, C15410196; H3K4me2, Diagenode, C15410035, EPAS1 Abcam ab199                                                                                                                                                                                                                                                  |
| Peak calling parameters | Narrow peaks were called on deduplicated bam files using the following command: macs2 callpeak --SPMR -B -q 0.01 --keep-dup 1 -g hs -f BAMPE --extsize 146 --nomodel -t (treat.bam).                                                                                                                                             |
| Data quality            | ChIP-seq data were shown to be of high quality by multiple measures, including peak number, fraction of reads in peaks (FRiP score), number of peaks with >10-fold or >20-fold enrichment. narrowPeak calls contained an average of 16047 peaks with >10-fold enrichment. Metrics for individual samples are listed in table S26 |
| Software                | MACS v2.1.1.20140616 was used for ChIP-seq peak calling                                                                                                                                                                                                                                                                          |
